# Supplementary material for: The most common European HINT1 neuropathy variant phenotype and its case studies
Source: PubMed Central journal article supplement (PMC9981799; doi:10.3389/fneur.2023.1084335), 2023-02-17
Supplement: Table_1.pdf [file Table_1.pdf]

## Supplement to “The most common European HINT1 neuropathy variant phenotype and its case studies”

Supplement Table 1. Allele frequency of variant c.110G>C (p.Arg37Pro) in European populations.

| Population       | Allele frequency |
|------------------|------------------|
| Latvia           | 0.0100           |
| Bulgaria         | 0.0037           |
| Estonia          | 0.0031           |
| Russia           | 0.0020           |
| Finland          | 0.0009           |
| Sweden           | 0.0005           |
| Northwest Europe | 0.0001           |
| South Europe     | 0.0000           |

Supplement Table 2. Nerve ultrasonography of patients with *HINT1* neuropathy

|   | Median nerve cross-section area (CSA) dx (cm <sup>2</sup> ) |                 |                 |                 |                 |                 |            |           | Ulnar nerve cross-section area (CSA) dx (cm <sup>2</sup> ) |                 |                 |                 |                 |                 |            |           |
|---|-------------------------------------------------------------|-----------------|-----------------|-----------------|-----------------|-----------------|------------|-----------|------------------------------------------------------------|-----------------|-----------------|-----------------|-----------------|-----------------|------------|-----------|
|   | P1<br>HINT<br>1                                             | P2<br>HINT<br>1 | P3<br>HINT<br>1 | P4<br>HINT<br>1 | P5<br>CMT1<br>A | P6<br>CMT1<br>A | P7<br>AGel | P8<br>ALS | P1<br>HINT<br>1                                            | P2<br>HINT<br>1 | P3<br>HINT<br>1 | P4<br>HINT<br>1 | P5<br>CMT1<br>A | P6<br>CMT1<br>A | P7<br>AGel | P8<br>ALS |
| 1 | 0.07                                                        | 0.09            | 0.10            | 0.09            | 0.08            | 0.19            | 0.15       | 0.11      | 0.06                                                       | 0.04            | 0.04            | 0.05            | 0.06            | 0.10            | 0.05       | 0.06      |
| 2 | 0.06                                                        | 0.04            | 0.06            | 0.06            | 0.18            | 0.23            | 0.11       | 0.09      | 0.04                                                       | 0.05            | 0.07            | 0.05            | 0.07            | 0.15            | 0.06       | 0.06      |
| 3 | 0.06                                                        | 0.05            | 0.11            | 0.05            | 0.27            | 0.38            | 0.11       | 0.07      | 0.05                                                       | 0.06            | 0.06            | 0.05            | 0.14            | 0.25            | 0.08       | 0.11      |
| 4 | 0.07                                                        | 0.06            | 0.11            | 0.08            | 0.12            | 0.32            | 0.16       | 0.10      | 0.07                                                       | 0.06            | 0.07            | 0.08            | 0.08            | 0.13            | 0.14       | 0.08      |
| 5 | 0.10                                                        | 0.05            | 0.10            | 0.09            | 0.58            | 0.33            | 0.16       | 0.20      | 0.06                                                       | 0.06            | 0.06            | 0.04            | 0.17            | 0.25            | 0.14       | 0.12      |
| 6 | 0.10                                                        | 0.05            | 0.07            | 0.06            | 0.44            | 0.28            | 0.29       | 0.11      | 0.05                                                       | 0.05            | 0.07            | 0.08            | 0.32            | 0.33            | 0.21       | 0.11      |

Median nerve positions: 1) on the level of the carpal canal, 2) proximal to the carpal canal, 3) middle 1/3 of the forearm, 4) proximal to cubital fossa, 5) in the cubital fossa, 6) on the level of armpit region (axillar region);

Ulnar nerve positions: 1) on the level of the Guyons canal, 2) proximal to the Guyons canal, 3) middle 1/3 of the forearm, 4) below elbow 6) above elbow
